# Supplementary material for: EPR, ENDOR and HYSCORE study of X-ray induced centres in K2YF5 thermoluminescent phosphors
Source: Royal Society of Chemistry journal article supplement (doi:10.1039/b717775e), 2008-01-01
Supplement: b717775e.pdf [file b717775e.pdf]

## SUPPLEMENTARY INFORMATION TO

### EPR, ENDOR AND HYSORE STUDY OF X-RAY INDUCED CENTRES IN $K_2YF_5$ THERMOLUMINESCENT PHOSPHORS

Dmitry Zverev, Henk Vrielinck, Freddy Callens, Paul Matthys,  
Sabine Van Doorslaer, Nicholas Khaidukov

#### Cross peak linking the triple-quantum (tq) frequencies in the $^{39}K$ HYSORE experiment

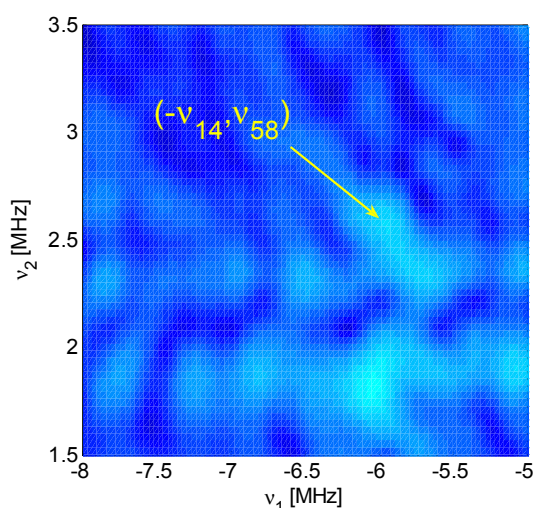

**Fig. S1** [-8 - -5, 1.5 – 3.5] MHz region from the experimental HYSORE spectrum of  $K_2YF_5:Ce$  (0.1%). Magnetic field  $B_0=343.95$  mT along the  $a$ -axis corresponds to the C1 centre EPR line position. The cross peak between the tq frequencies  $(-\nu_{58}, \nu_{14})$  of the type-I  $^{39}K$  interaction is shown.

#### $^{19}F$ HYSORE

As mentioned in the main text, the weak  $^{19}F$  modulations are largely suppressed by the strong  $^{39}K$  modulations in the HYSORE spectrum. As a consequence, only weak  $^{19}F$  cross peaks are observed in the area where we expect contributions for interactions 2, 3.1 and 3.2. The  $^{19}F$  signals due to interaction 1 (hyperfine splitting in this observer position  $\sim 12$  MHz) are not observed.

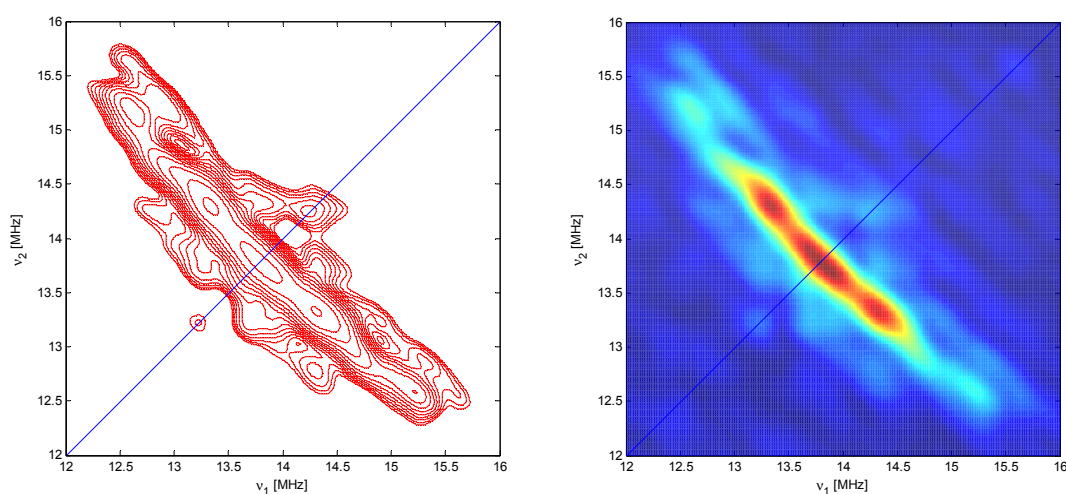

**Fig S2.**  $^{19}F$  HYSORE spectrum of  $K_2YF_5:Ce$  (0.1%). Magnetic field  $B=343.95$  mT along the  $a$ -axis corresponds to the C1 centre EPR line position.
